# Supplementary material for: β-catenin and γ-catenin are dispensable for T lymphocytes and AML leukemic stem cells
Source: eLife journal article supplement (doi:10.7554/elife.55360), 2020-08-21
Supplement: supp [file elife-55360-supp-v1.zip]

Archive with 12 entries (12 files):
- elife_poa_e55360_Figure_1_figure_supplement_1.tif
- elife_poa_e55360_Figure_1_figure_supplement_2.tif
- elife_poa_e55360_Figure_1_figure_supplement_3.tif
- elife_poa_e55360_Figure_1_figure_supplement_4.tif
- elife_poa_e55360_Figure_1_figure_supplement_5.tif
- elife_poa_e55360_Figure_3_figure_supplement_1.tif
- elife_poa_e55360_Figure_3_figure_supplement_2.tif
- elife_poa_e55360_Figure_1_source_data_1.xlsx
- elife_poa_e55360_Figure_2_source_data_1.xlsx
- elife_poa_e55360_Figure_3_source_data_1.xlsx
- elife_poa_e55360_Figure_4_source_data_1.xlsx
- elife_poa_e55360_Transparent_Reporting_File.pdf
