# Supplementary material for: β-catenin and γ-catenin are dispensable for T lymphocytes and AML leukemic stem cells
Source: eLife journal article supplement (doi:10.7554/elife.55360), 2020-08-21
Supplement: supp [file elife-55360-supp-v1.zip › elife_poa_e55360_Figure_1_source_data_1.xlsx]

## Sheet: Fig 1E
		CreER+WT	CreER+Ctnnb1fl/fl	CreER+Ctnnb1fl/flJupfl/fl
	CD45.2+ thymocyte numbers (✕106)	25	38	27
		37	33	31
		21	28	33
		32	28	36
		29	30	31
		31
		27
		31

## Sheet: Fig 1F
		Thymic subsets (%)
		DN	DP	CD4+	CD8+
	CreER+WT	2.61	30.4	51.4	15.7
		3	32.9	48.3	15.9
		1.95	44.1	41.1	12.8
		1.84	33.4	49.3	15.4
		1.86	40.7	43.3	14.1
		0.94	33.2	49.6	16.3
		2	34	47.8	16.2
		2.38	34.3	49	14.2
	CreER+Ctnnb1fl/fl	2.79	37.6	46.2	13.5
		2.18	40.4	44.5	13
		1.87	42.3	43.2	12.6
		2.21	31.9	51	14.9
		2.46	29.8	51.4	16.3
	CreER+Ctnnb1fl/flJupfl/fl	1.83	40	44.2	14
		1.72	39.9	45.4	12.9
		1.32	48.7	38.4	11.6
		1.66	36.4	45.6	16.4
		2.12	27.9	51.5	18.5

## Sheet: Fig 1G
		Thymic subsets (%)
		DN1	DN2	DN3	DN4
	CreER+WT	2.12	5.39	56.7	35.8
		2.44	6.06	61.2	30.3
		2.07	3.99	54.1	39.8
		2.51	5.39	70.8	21.3
		1.62	6.25	68	24.1
		3.82	5.89	58.1	32.2
		1.5	3.96	51.2	43.3
		1.21	5.11	52.2	41.5
	CreER+Ctnnb1fl/fl	2.05	4.28	63.3	30.4
		2.67	4.96	58.9	33.5
		2.56	4.58	52.9	40
		1.01	5.7	53.1	40.1
		1.19	4.01	52.1	42.7
	CreER+Ctnnb1fl/flJupfl/fl	1.59	4.7	68.3	25.4
		1.42	3.81	67.9	26.8
		1.19	3.69	61.9	33.2
		1.51	5.01	53.1	40.4
		1.6	2.31	50	46
