# Supplementary material for: β-catenin and γ-catenin are dispensable for T lymphocytes and AML leukemic stem cells
Source: eLife journal article supplement (doi:10.7554/elife.55360), 2020-08-21
Supplement: supp [file elife-55360-supp-v1.zip › elife_poa_e55360_Figure_2_source_data_1.xlsx]

## Sheet: Fig 2A
		CreER+WT	CreER+Ctnnb1fl/fl	CreER+Ctnnb1fl/flJupfl/fl
	CXCR5+SLAMlo TFH cells (%)	45.6	49.2	49.9
		50.5	47.9	50.4
		53.7	40	48.7
		43.6		48.6
		49.3		44.4
		43.9		44.5
				38.4

## Sheet: Fig 2B
		CreER+WT	CreER+Ctnnb1fl/fl	CreER+Ctnnb1fl/flJupfl/fl
	CXCR5+Bcl6+ GC-TFH cells (%)	9.82	10.3	12.1
		14.1	8.84	13.2
		12.9	8.54	9.55
		9.37		12.8
		14.4		12
		10.3		7.58
				7.18

## Sheet: Fig 2C
		CreER+WT	CreER+Ctnnb1fl/fl	CreER+Ctnnb1fl/flJupfl/fl			CreER+WT	CreER+Ctnnb1fl/fl	CreER+Ctnnb1fl/flJupfl/fl
	IFN-𝛾+ cells (%)	17.22	18.25	11		% of TNF-a+ in IFN-𝛾+ cells	51.4	47.4	54.5
		11.33	14.42	12.84			52.9	50.3	67.5
		16.16	13.97	18.35			42.7	56.8	54.8
		8.56		13.93			56.4		54
		14.06		16.4			40		53.9
				18.13			41.6		50.5
									52.9

## Sheet: Fig 2D
		CreER+WT	CreER+Ctnnb1fl/fl	CreER+Ctnnb1fl/flJupfl/fl
	Granzyme B relative Expression (%)	99.898	93.1617	88.2653
		91.8367	111.344	88.1633
		127.245	92.4377	81.4286
		81.0204		87.9592
		125.422		93.6444
		74.5776		86.5648
				73.7731

## Sheet: Fig 2E
		CreER+WT	CreER+Ctnnb1fl/flJupfl/fl
	CXCR5+TFH cells (%)	44.2	53.1
		50.8	59.7
		61.9	54.4
		58	62.8
		48.1	60.7
		46.7	41.4
		52.3	57.4
		44.7	48
		42.4

## Sheet: Fig 2F
		CreER+WT	CreER+Ctnnb1fl/flJupfl/fl			CreER+WT	CreER+Ctnnb1fl/flJupfl/fl
	IFN-𝛾+ cells (%)	4.56	6.3		% of TNF-a+ in IFN-𝛾+ cells	60.2	83
		3.28	8.04			81.7	85.1
		3.85	7.01			75.4	87.2
		4.09	5.9			76.5	87.1
		5.14	5.2			74.1	65.9
		4.56	4.19			81.7	76.5
		5.16	4.55			71.7	71.9
						75.7
						81.7
