# Supplementary material for: β-catenin and γ-catenin are dispensable for T lymphocytes and AML leukemic stem cells
Source: eLife journal article supplement (doi:10.7554/elife.55360), 2020-08-21
Supplement: supp [file elife-55360-supp-v1.zip › elife_poa_e55360_Figure_3_source_data_1.xlsx]

## Sheet: Fig 3A
		CreER+WT	CreER+Ctnnb1fl/fl	CreER+Ctnnb1fl/flJupfl/fl
	CD45.2+ BM cell numbers (✕106)	26.944	24.592	23.66
		23.809	30.708	34.44
		19.8	22.282	16.905
		26.319	23.352	23.016
		20.775	19.052	21.06
		22.896
		33.072
		25.11

## Sheet: Fig 3B
		CreER+WT	CreER+Ctnnb1fl/fl	CreER+Ctnnb1fl/flJupfl/fl			CreER+WT	CreER+Ctnnb1fl/fl	CreER+Ctnnb1fl/flJupfl/fl
	LSK in Lin– cells (%)	3.04	2.91	2.29		HSCs in LSKs (%)	7.73	8.65	6.91
		2.96	2.91	2.51			6.63	8.26	7.12
		2.55	3.01	2.91			6.16	7.86	7.38
		3.27	2.79	3.07			7.93	7.51	7.44
		2.76	2.89	3.09			6.93	7.48	10.4
		2.68	2.43				7.98	8.21
		3.13	2.73				8.83	7.67
		2.59	2.68				6.83	7.63
		2.59	2.58				7.18	6.73
		2.67					7.88
		2.67					7.71

## Sheet: Fig 3F
		GFP+Mac1+ in PBCs (%)								GFP+Mac1+ in PBCs (%)
	Exp1	2 wks		4 wks		8 wks			Exp 2	2 wks		4 wks		8 wks
		CreER+WT	CreER+Ctnnb1fl/fl	CreER+WT	CreER+Ctnnb1fl/fl	CreER+WT	CreER+Ctnnb1fl/fl			CreER+WT	CreER+Ctnnb1fl/fl	CreER+WT	CreER+Ctnnb1fl/fl	CreER+WT	CreER+Ctnnb1fl/fl
		1.94	5.08	23.4	30	82.6	83.3			3.61	8.24	73.7	55.8	79.6	87.6
		2.48	7.35	31.1	47.8	75.2	76.5			3.89	8.17	75.9	43.7	70.1	93.6
		4.07	3.91	18.6	53	83.9	78.4			3.27	5.52	53.6	45.4	78.8	89.9
		2.71	3.87	34.9	57.9	69.3	85.4			0.84	8.43	59.9	52.8	75.9
		2.96	3.67	23	45.1	73.7	77.7			3.06	6.6	68.2	66.5
		2.38	4.99	53.7	37.5		70.7			1.97	7.69	54.8	52.8
		3.33	3.28	22.3	37.5		74.2			4.87	11.9	73.3	56.3
		1.29	4.81	10.1	72.6					3.57	6.06	63	45.8
		0.88	4.32	18.4	29.4					5.2	7.63	58.6	37.8
		1.74	3.68	18.2	44.5					1.55	3.22	63.2	23.4
