# Supplementary material for: β-catenin and γ-catenin are dispensable for T lymphocytes and AML leukemic stem cells
Source: eLife journal article supplement (doi:10.7554/elife.55360), 2020-08-21
Supplement: supp [file elife-55360-supp-v1.zip › elife_poa_e55360_Figure_4_source_data_1.xlsx]

## Sheet: Fig 4D
		CreER+ WT	CreER+ Tcf1/Lef1 dKO	CreER+ Tcf3/4 dKO	CreER+ Tcf-qKO
	Thymocytes (×106)	47	0.56	43.2	2.5
		34	1.2	35.2	4
		38	1.7	37.5	3.2
			0.68	32.8	4.1
			0.71
			3.2
			2.2

## Sheet: Fig 4E
		Thymic subsets (%)
		DN	DP	CD4+	CD8+
	CreER+ WT	5.63	83	8.83	2.43
		4.98	86.3	6.67	2.02
		4.09	85.8	7.89	2.14
	CreER+ Tcf1/Lef1 dKO	16.7	11.5	47.2	9.1
		15	3.52	59.1	22.4
		22.3	2.57	54.8	20.4
		16.3	14.9	51.1	17.3
		18.9	14.4	49.8	16.6
		19.4	21.3	48.4	10.3
		9.72	19.2	56.6	13.9
	CreER+ Tcf3/4 dKO	5.7	52.8	28.9	11.5
		7.4	31.4	43.5	16.6
		5.29	61.4	24.2	8.35
		6.28	65.1	21.2	6.5
	CreER+ Tcf-qKO	2.56	17.2	60.9	18.4
		5.99	16.9	61.4	14.6
		11.4	16.7	51.8	19
		3.91	16.3	61.1	17.8

## Sheet: Fig 4F
		Thymic subsets (%)
		DN1	DN2	DN3	DN4
	CreER+ WT	10	4.52	55.6	29.8
		9.78	4.64	62	23.5
		8.94	5.08	58.3	27.7
	CreER+ Tcf1/Lef1 dKO	23.7	5.84	59.5	11
		16.7	5.19	74.3	3.86
	CreER+ Tcf3/4 dKO	10.8	4.87	67.9	16.4
		9.43	7.51	59.3	23.8
		9.8	7.75	57	25.4
		6.71	5.51	67.5	20.2
	CreER+ Tcf-qKO	13.1	6.81	72	8.1
		7.91	5.78	81.7	4.64
		33.9	5.25	39.9	21
		14.5	3.03	68.8	13.7

## Sheet: Fig 4H
		GFP+Mac1+ in PBCs (%)								GFP+Mac1+ in PBCs (%)
		2 wks		4 wks		8 wks				2 wks		4 wks		8 wks
		CreER+WT	CreER+ Tcf-qKO	CreER+WT	CreER+ Tcf-qKO	CreER+WT	CreER+ Tcf-qKO			CreER+WT	CreER+ Tcf-qKO	CreER+WT	CreER+ Tcf-qKO	CreER+WT	CreER+ Tcf-qKO
	exp1	1.94	1.47	23.4	35.2	82.6	73.7		Exp 2	3.28	0.95	9.89	6.56	62.2	42
		2.48	1.9	31.1	24.6	75.2	57.6			0.76	1.09	25.6	3.61	77	60.1
		4.07	0.86	18.6	13.3	83.9	71.9			2.95	2.1	24.7	8.94	74.2	37.9
		2.71	2.94	34.9	24.5	69.3	73			2.72	1.16	8.04	6.96	54.4	37.8
		2.96	1.51	23	34.1	73.7				2.04	2.64	12.7	11.1	59.5	43.2
		2.38	0.94	53.7	14.1					2.93	1.76	6.02	3.15	21.8	56.7
		3.33	42.2	22.3	63.7					1.14	1.01	1.81	6.14	68.2
		1.29	4.42	10.1	58.3					1.08	0.68	1.2	30	49.1
		0.88	3.83	18.4	18.4					1.58	1.15	1.2	35.6	56.3
		1.74	1.69	18.2	11					1.74	1.91
