# Supplementary figures and images for: β-catenin and γ-catenin are dispensable for T lymphocytes and AML leukemic stem cells
Source: eLife journal article supplement (doi:10.7554/elife.55360), 2020-08-21

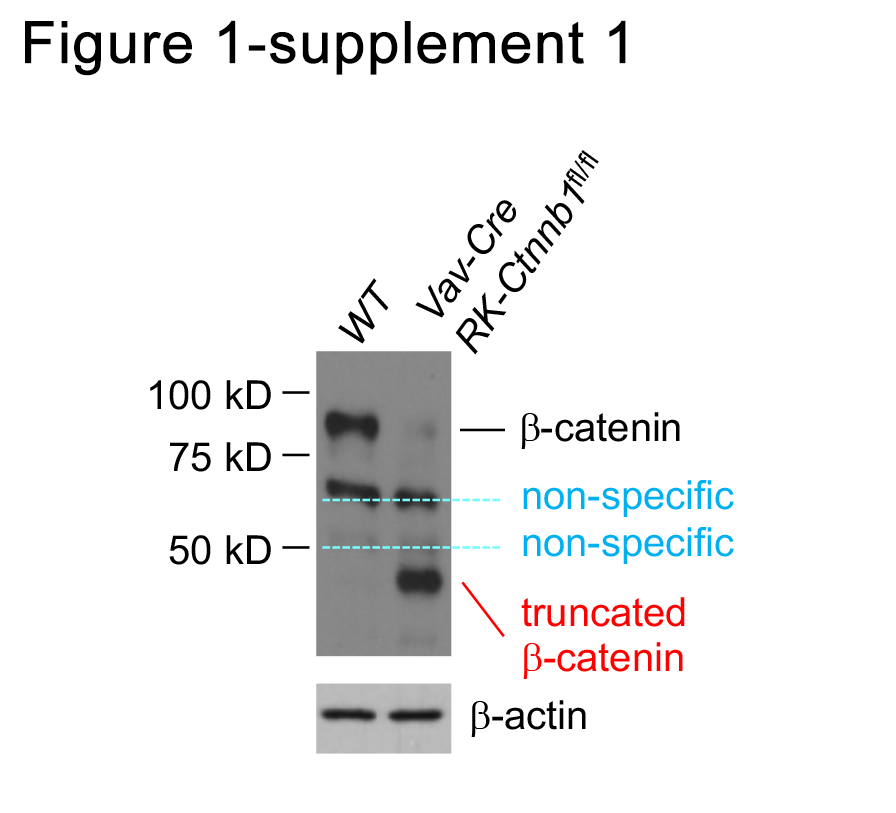

Supplement: supp [file elife-55360-supp-v1.zip › elife_poa_e55360_Figure_1_figure_supplement_1.tif]

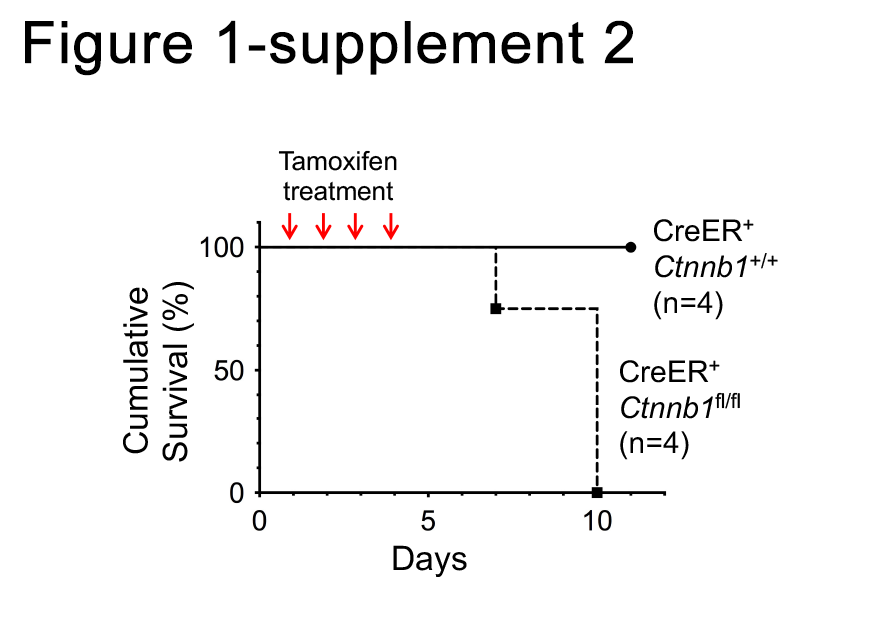

Supplement: supp [file elife-55360-supp-v1.zip › elife_poa_e55360_Figure_1_figure_supplement_2.tif]

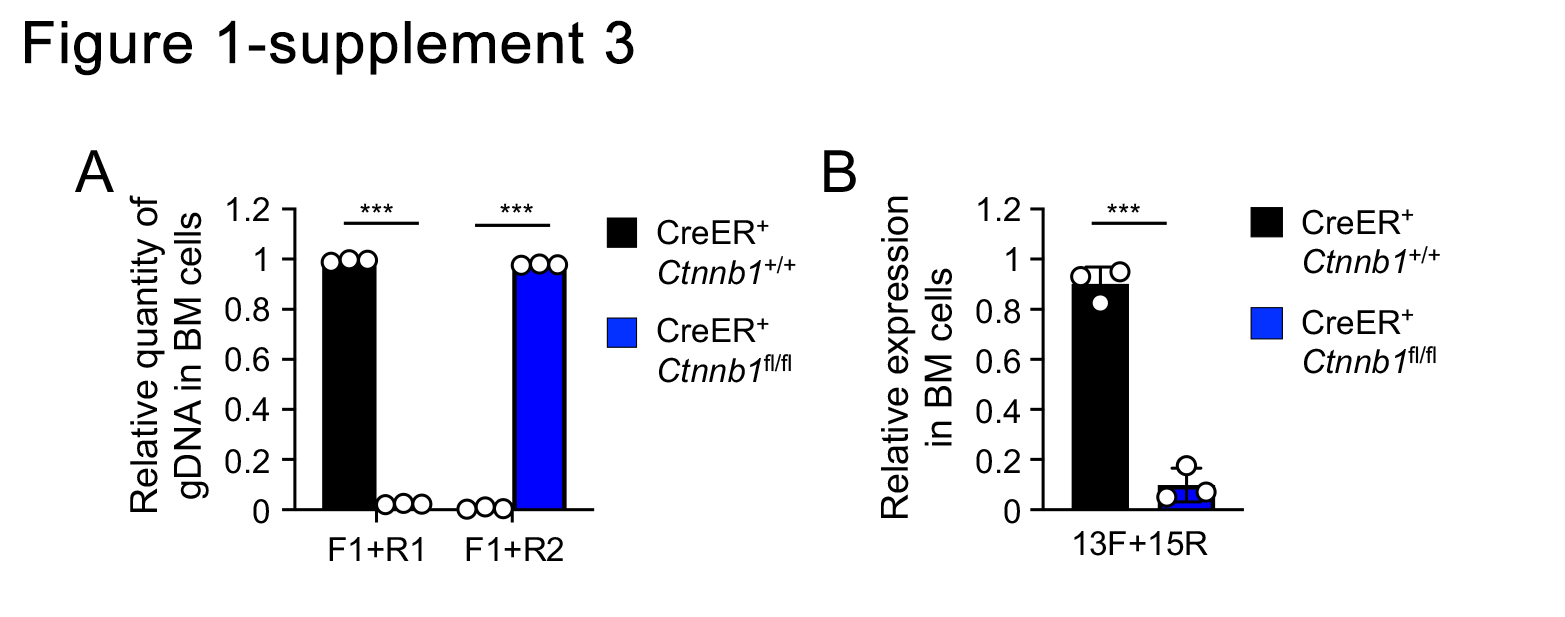

Supplement: supp [file elife-55360-supp-v1.zip › elife_poa_e55360_Figure_1_figure_supplement_3.tif]

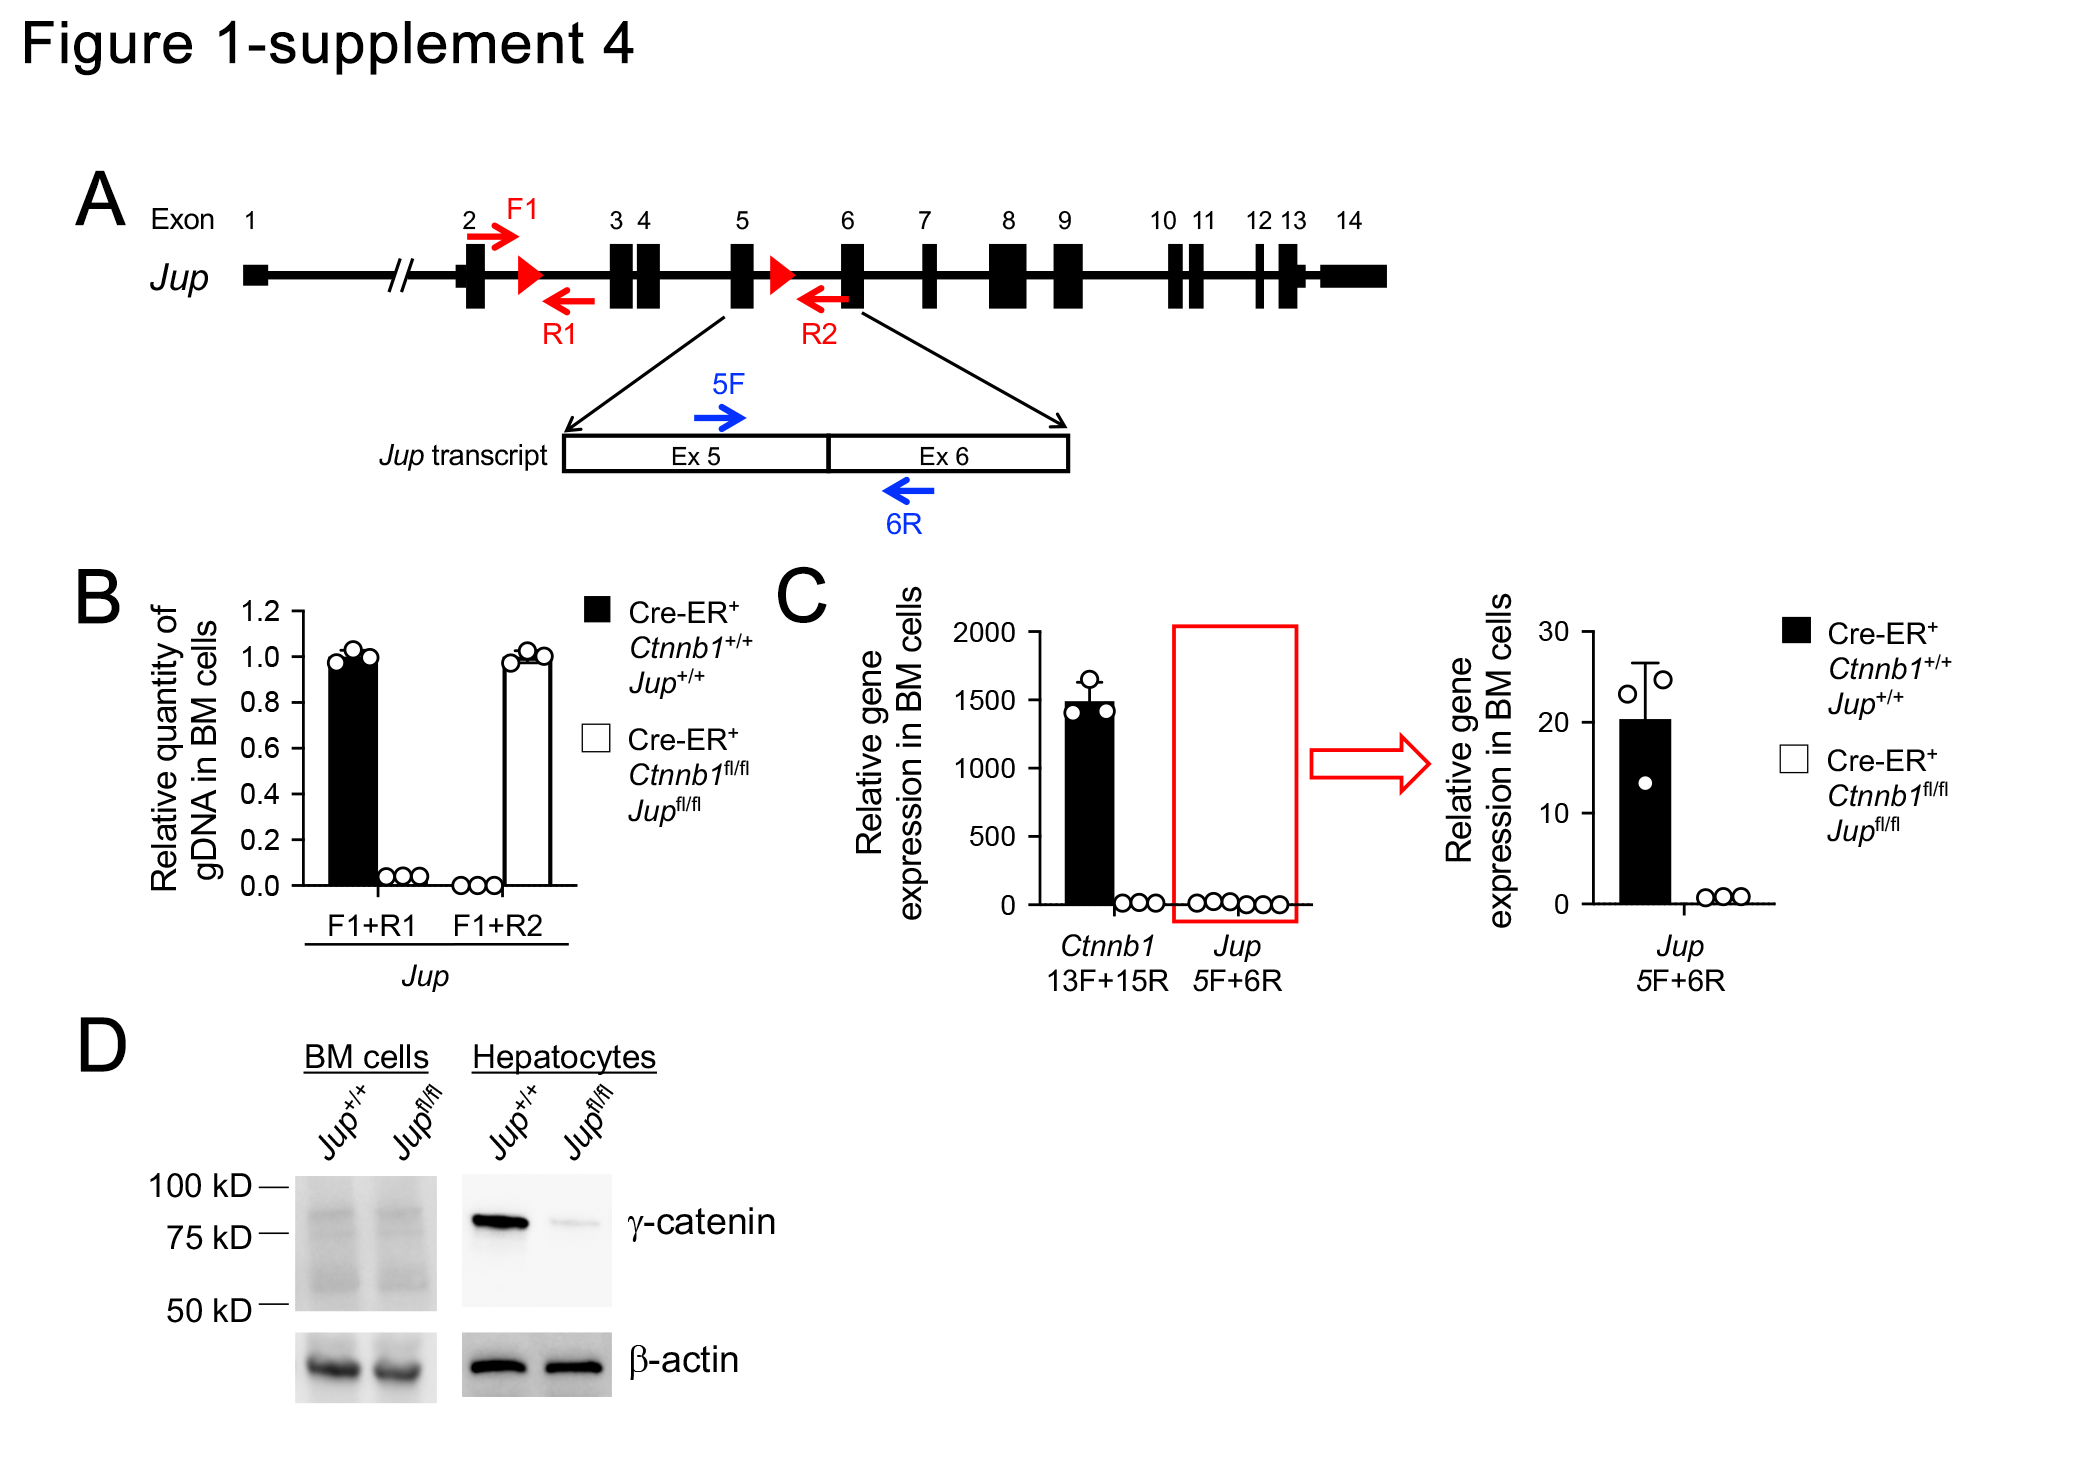

Supplement: supp [file elife-55360-supp-v1.zip › elife_poa_e55360_Figure_1_figure_supplement_4.tif]

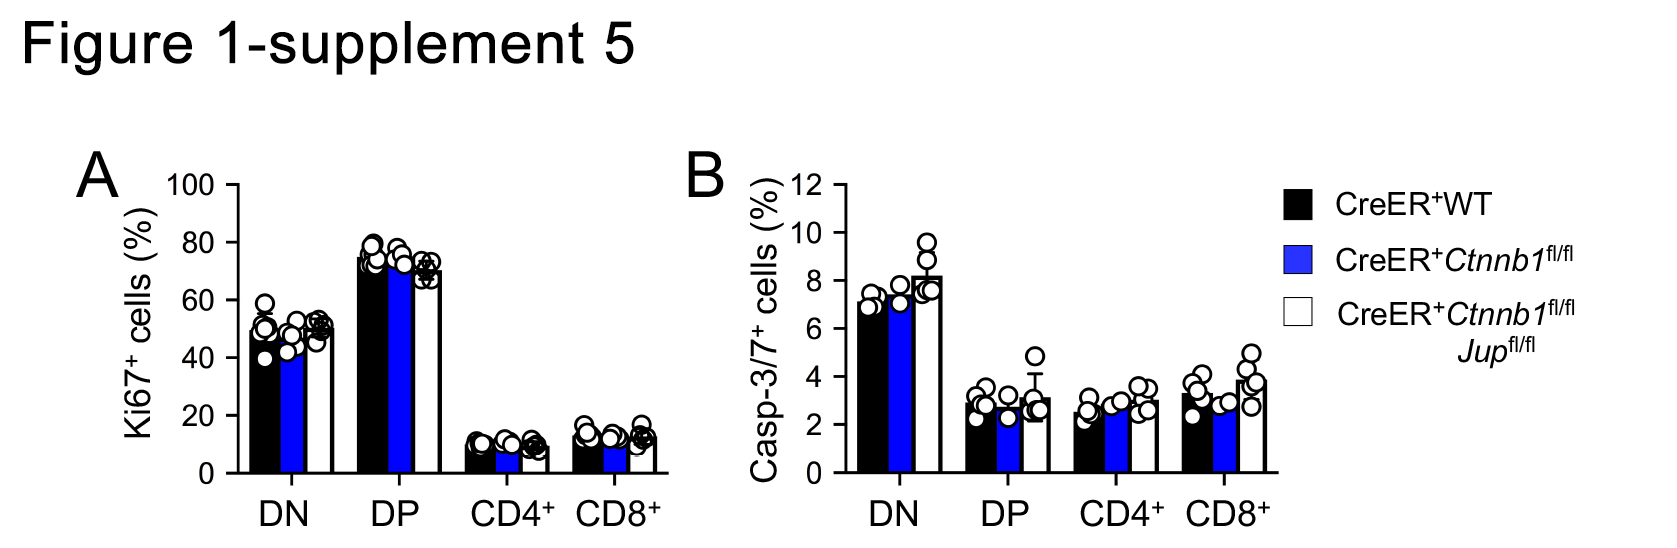

Supplement: supp [file elife-55360-supp-v1.zip › elife_poa_e55360_Figure_1_figure_supplement_5.tif]

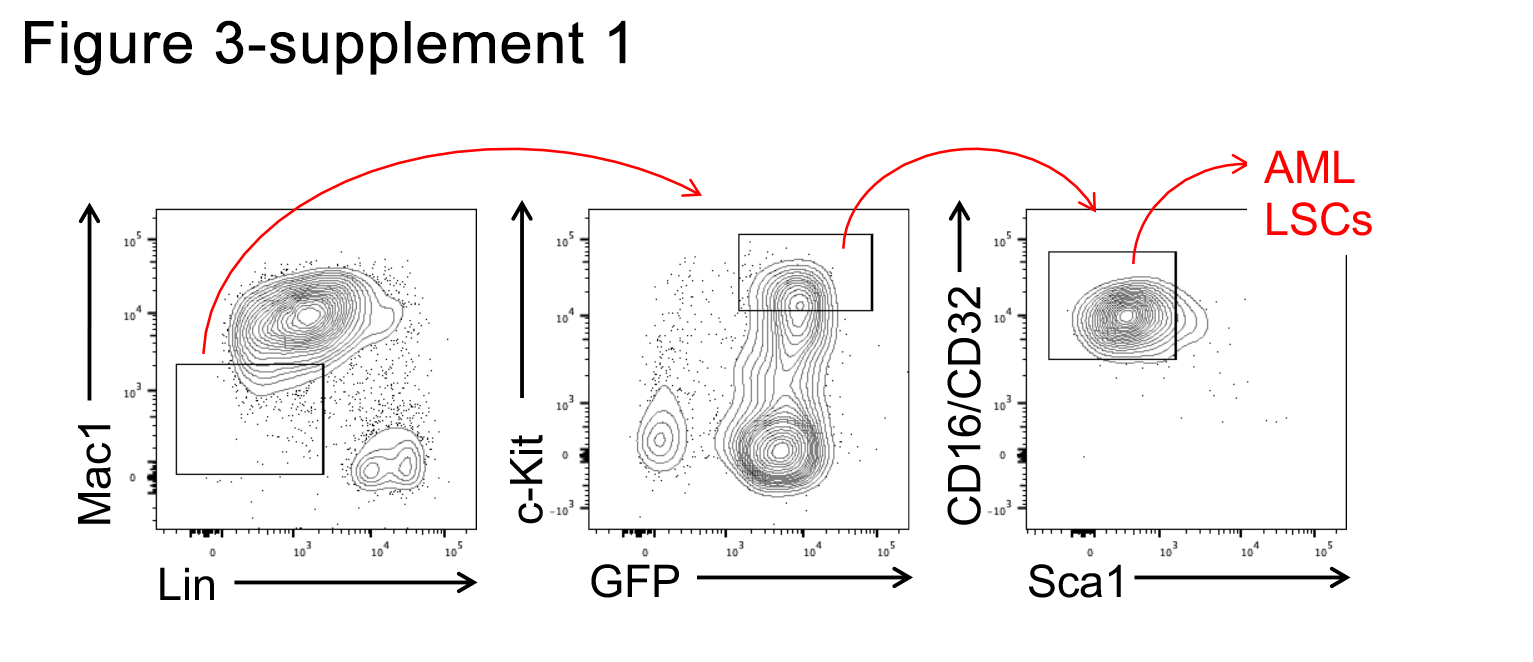

Supplement: supp [file elife-55360-supp-v1.zip › elife_poa_e55360_Figure_3_figure_supplement_1.tif]

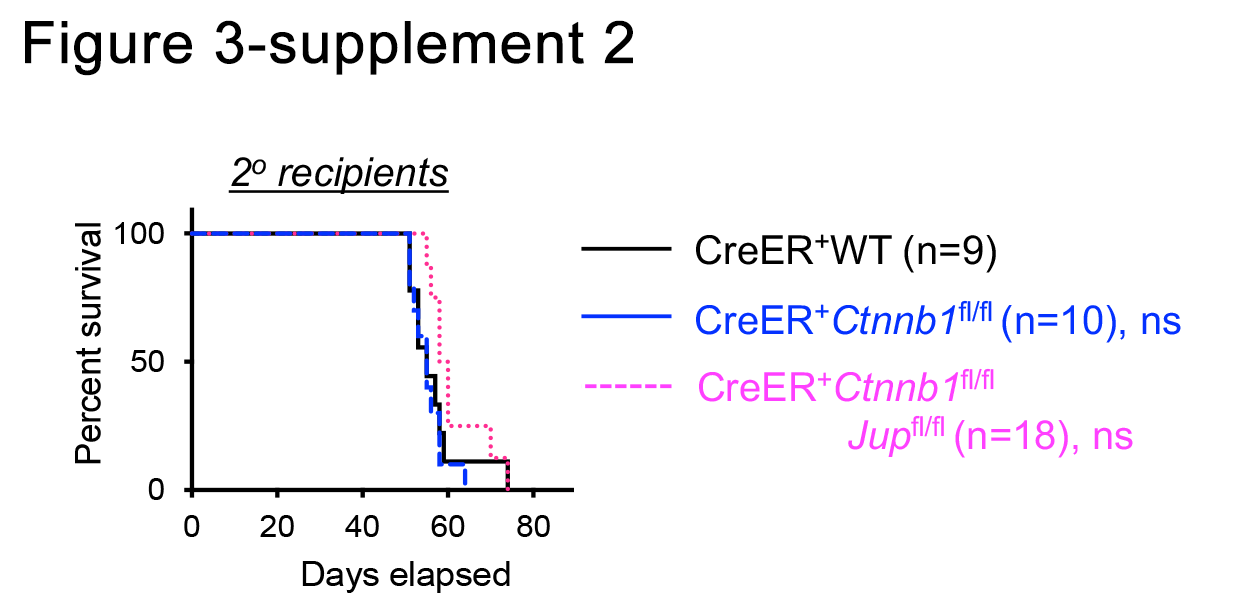

Supplement: supp [file elife-55360-supp-v1.zip › elife_poa_e55360_Figure_3_figure_supplement_2.tif]
